# Supplementary material for: Evolutionary trajectories of snake genes and genomes revealed by comparative analyses of five-pacer viper
Source: PubMed Central journal article supplement (PMC5059746; doi:10.1038/ncomms13107), 2016-10-06
Supplement: ncomms13107-s1.pdf [file ncomms13107-s1.pdf]

## Supplementary Figures

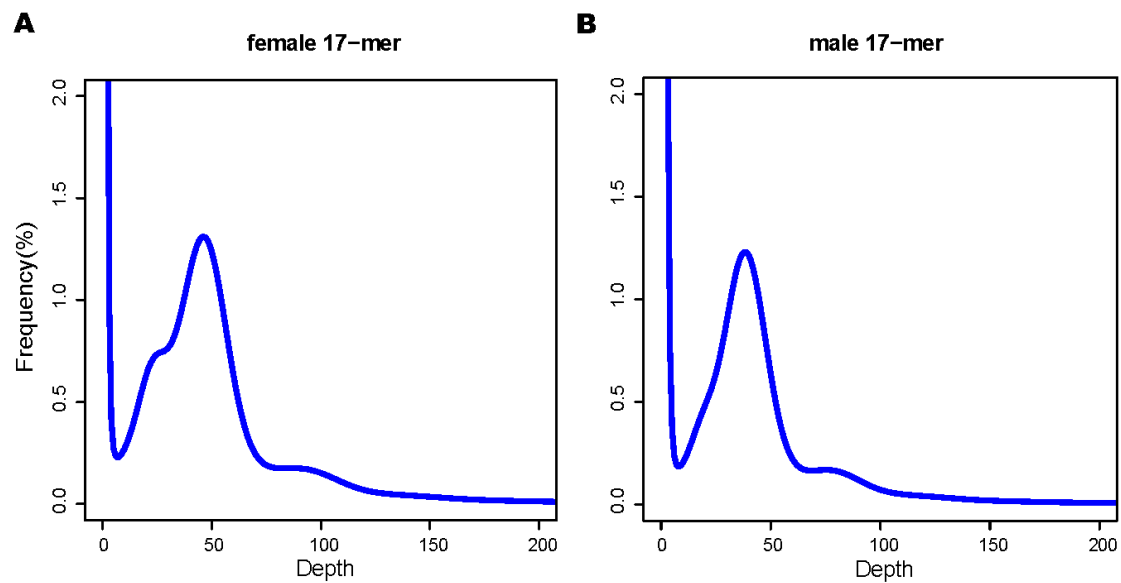

**Supplementary Figure 1. K-mer estimation of the genome size of five-pacer viper.** Distribution of 17-mer frequency in the used sequencing reads from female (left) and male (right) samples. The x-axis represents the sequencing depth. The Y-axis represents the proportion of a *K*-mer counts in total *K*-mer counts at a given sequencing depth. The estimated genome size is about 1.43 Gb.

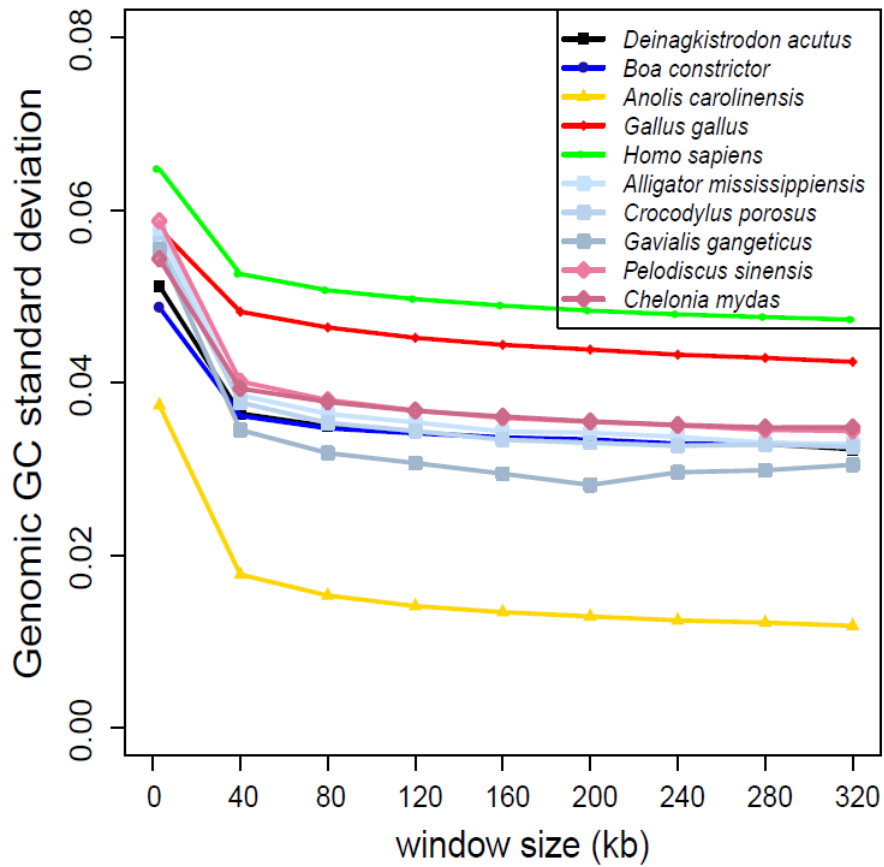

**Supplementary Figure 2. GC isochore structure of different tetrapod genomes.**  
 We show the standard deviation (SD) of GC content calculated with different window size (3 kb to 320 kb) for different vertebrate genomes.

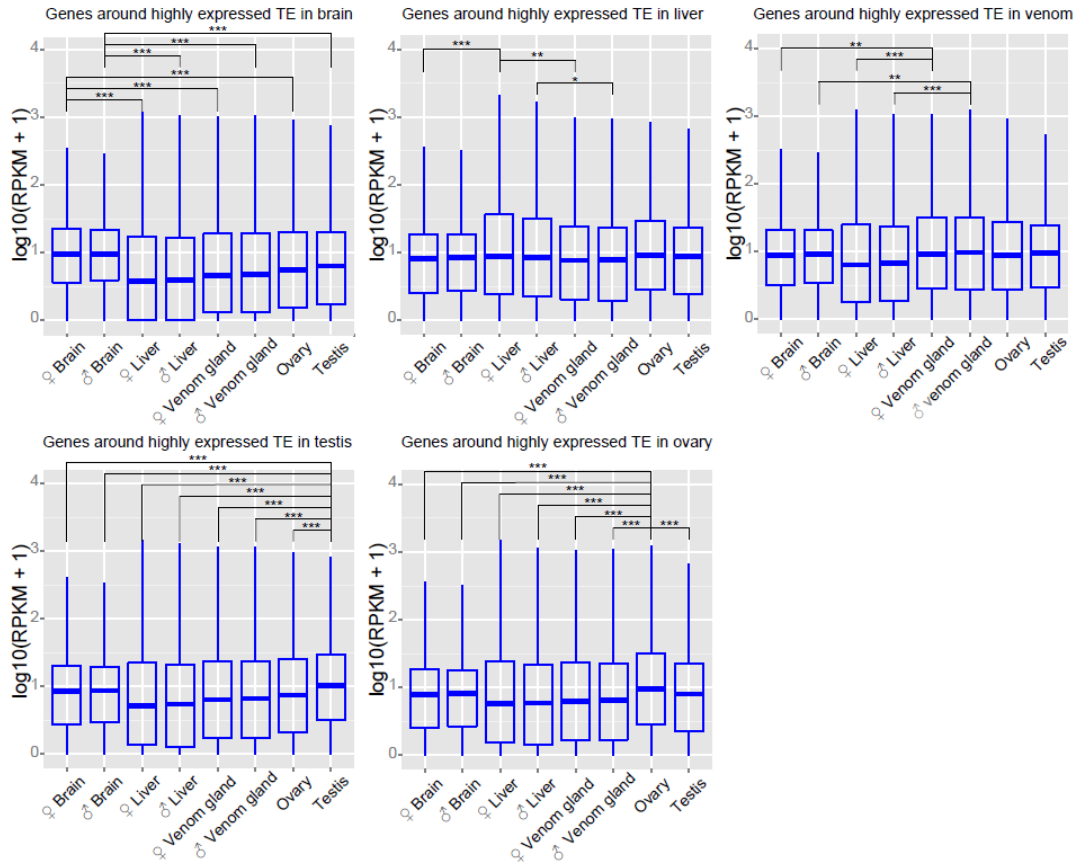

**Supplementary Figure 3. Comparing expression levels of genes nearby expressed TEs in each tissue.** We show expression patterns of genes around highly expressed TE (RPKM > 5) in different tissues from both sexes, including brain, liver, venom gland and gonad. We also performed comparison between the focal tissue vs. the other tissues. We show levels of significance with asterisks. \*: 0.001= $P$ -value <0.01; \*\*: 0.0001 = $P$ <0.001; \*\*\*:  $P$ <0.0001.

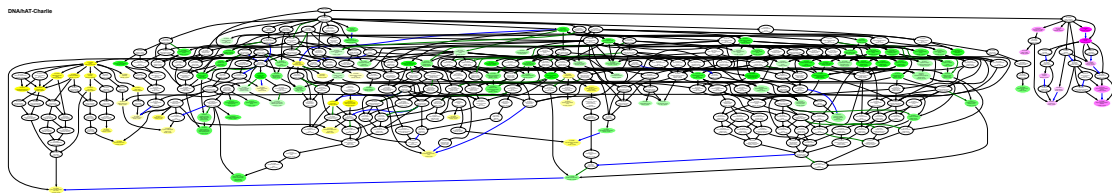

**Supplementary Figure 4. GO enrichment of nearby genes of DNA/hAT-Charlie highly expressed in brain.** Please zoom in for detail.

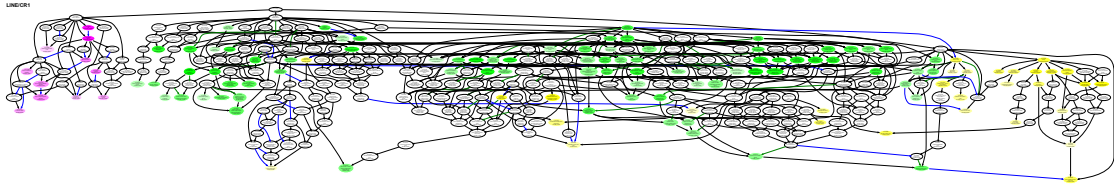

**Supplementary Figure 5. GO enrichment of nearby genes of LINE/CR1 highly expressed in brain. Please zoom in for detail.**

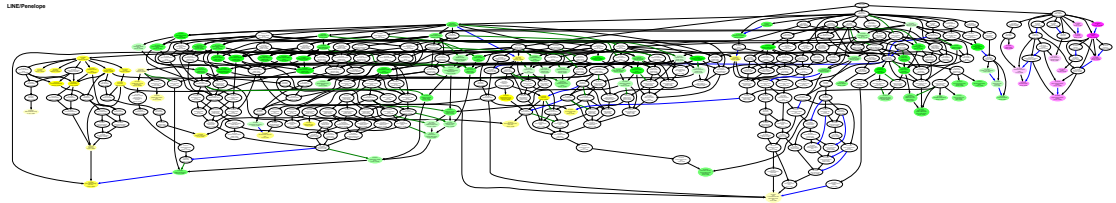

**Supplementary Figure 6. GO enrichment of nearby genes of LINE/Pelenope highly expressed in brain. Please zoom in for detail.**

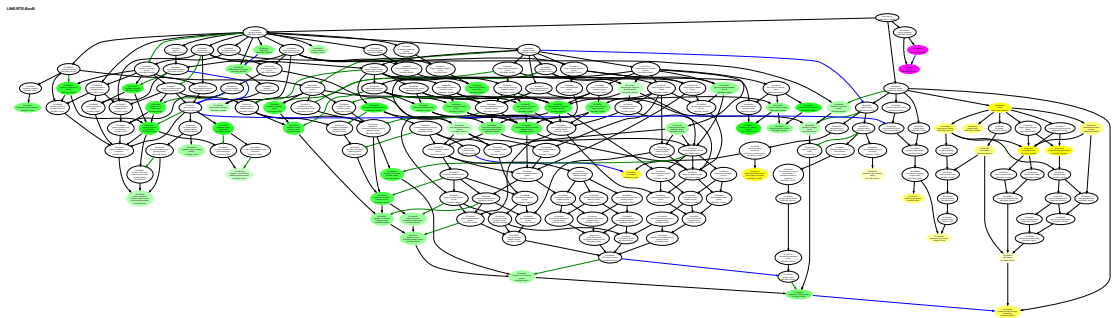

**Supplementary Figure 7. GO enrichment of nearby genes of LINE/ RTE-BovB highly expressed in brain. Please zoom in for detail.**



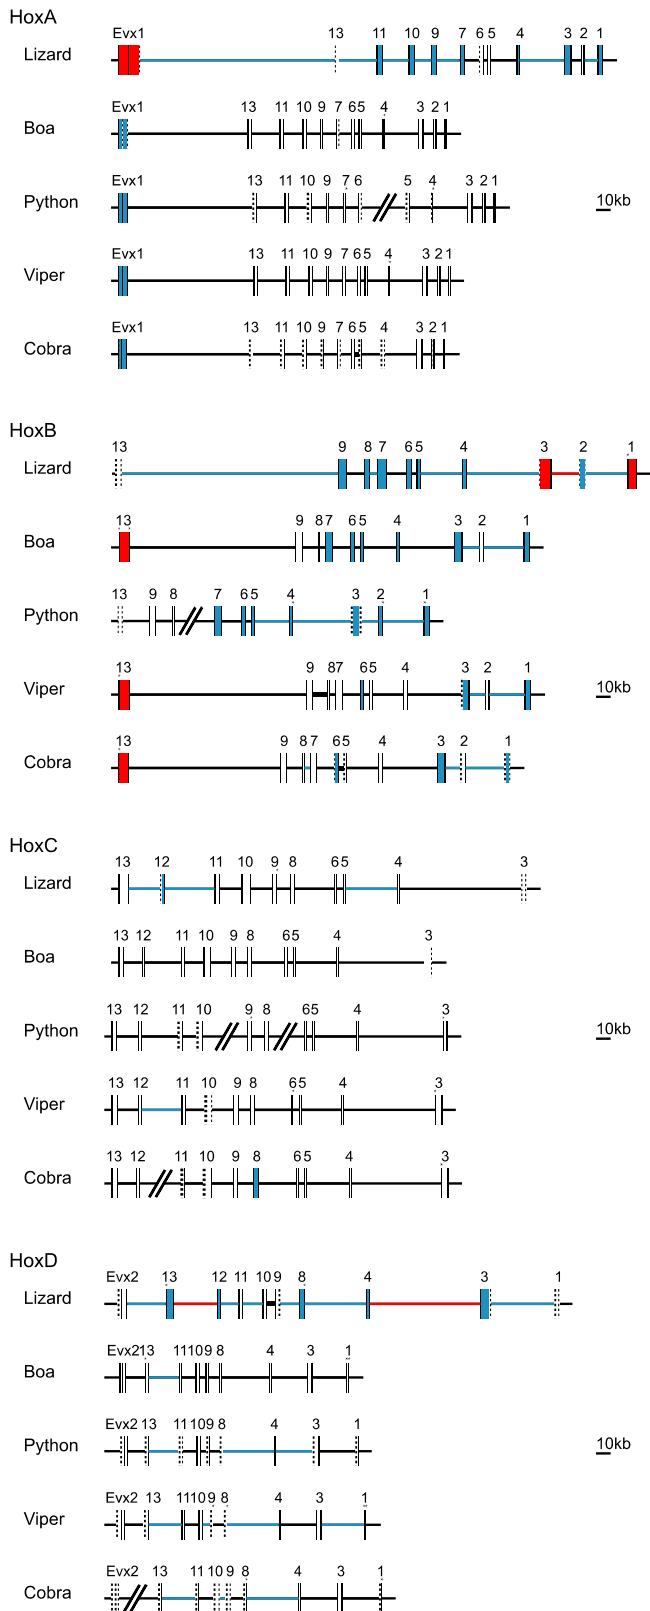

**Supplementary Figure 10. Comparison of *Hox* gene structure between snakes and lizard.** Schematic representation of four *Hox* clusters in anole lizard, boa,

Burmese python, five-pacer viper and king cobra. Each number from 1 to 13 denotes the specific *Hox* gene belonging to one cluster. We showed the length difference between each species vs. mouse by the colored lines (for intergenic regions) or boxes (for intronic regions): a 1.5~3 fold increase of length was shown by blue, a more than 3-fold increase was shown in red. Exons were shown by vertical lines, and dotted lines refer to exons with unknown boundaries, either due to assembly issues. Double-slashes refer to the gap between two different scaffolds.

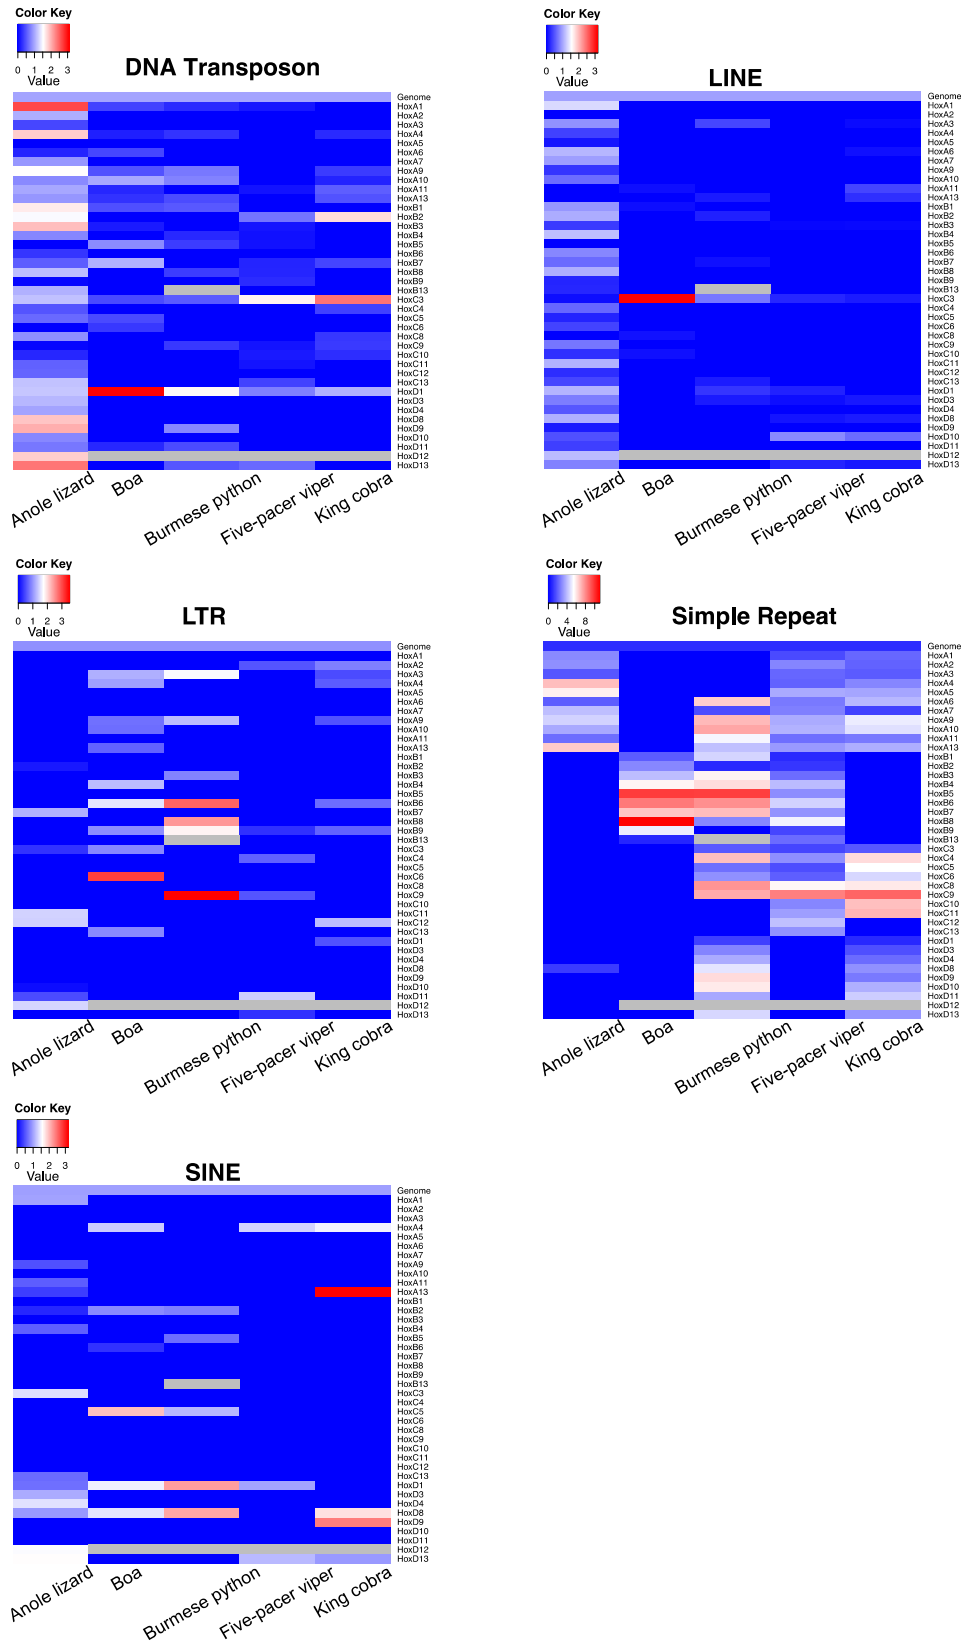

**Supplementary Figure 11. Repeat accumulation at *Hox* gene clusters.** Comparison of the TE and simple repeat content of *Hox* cluster genes with 5kb flanking regions between snakes and lizard. We calculated the repeat density by dividing the total length



of specific repeat sequence vs. the length of corresponding region. This density was normalized over the genome-wide repeat density and then shown by heatmap.

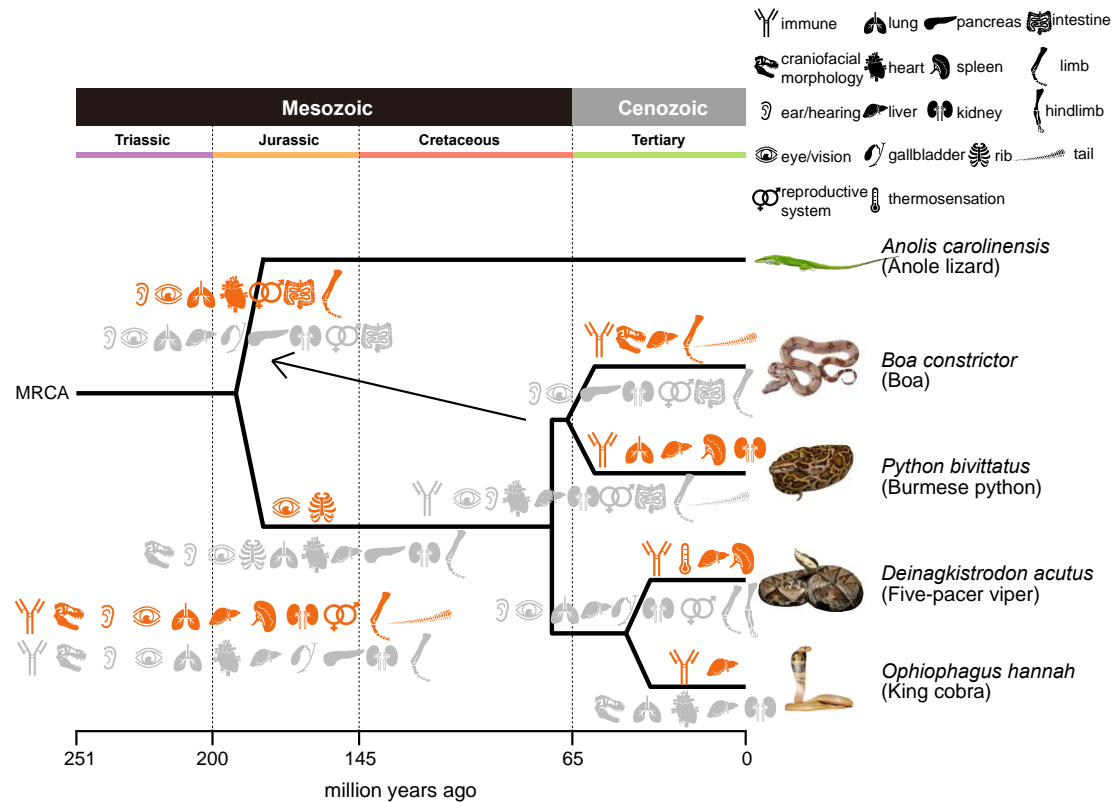

**Supplementary Figure 12. Phylogenetic distribution of enriched MP terms.** We identified enriched mutant phenotypes (MP) of mouse orthologs of snake genes that are undergoing lineage-specific positive selection (orange) and relaxed selective constraints (gray). And then we mapped these MP terms onto the snake phylogeny. Top-down animal photos are contributed by Mike Graziano, Sid Ewing, Camilla Bjerke, Ren-jie Wang and Zill Niazi, respectively. All rights reserved by the authors.

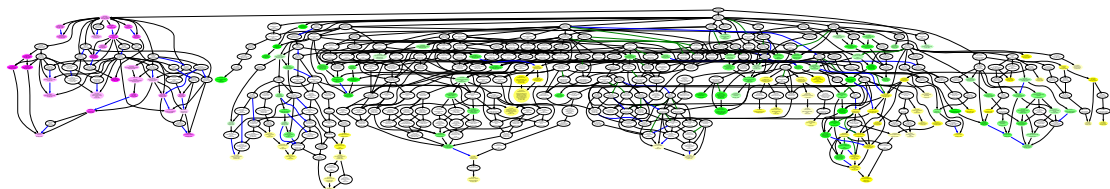

**Supplementary Figure 13. Plot of GO enrichment of contracted gene families along ancestral lineage of snakes using Ontologizer.** Please zoom in for detail.

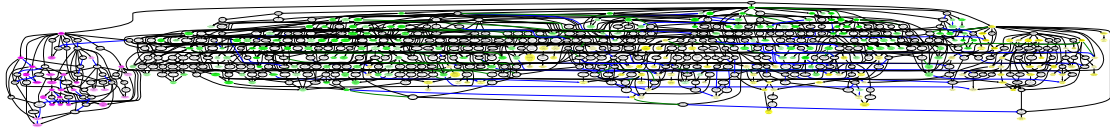

**Supplementary Figure 14. Plot of GO enrichment of expanded gene families along ancestral lineage of snakes using Ontologizer. Please zoom in for detail.**

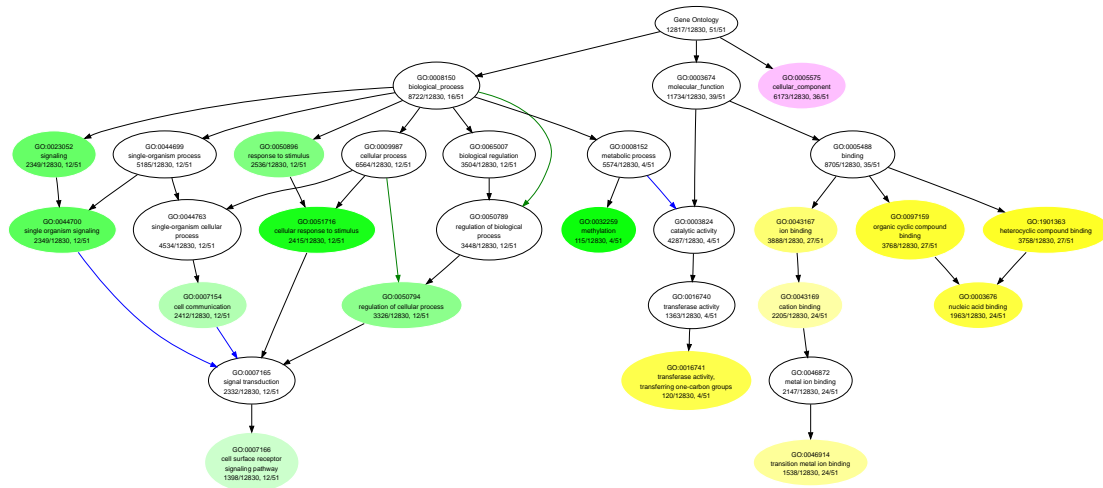

**Supplementary Figure 15. Plot of GO enrichment of contracted gene families along Henophidia lineage of basal snakes using Ontologizer. Please zoom in for detail.**

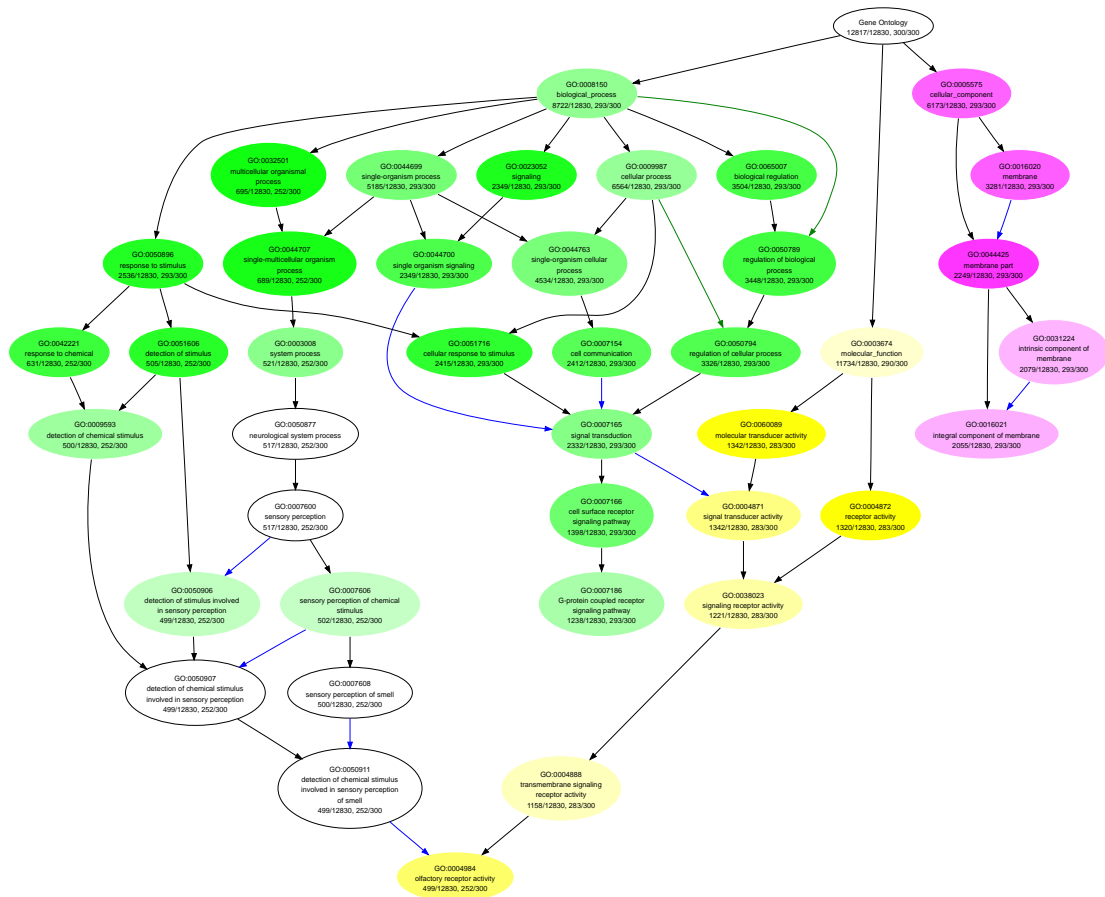

**Supplementary Figure 16. Plot of GO enrichment of expanded gene families along Henophidia lineage of basal snakes using Ontologizer. Please zoom in for detail.**

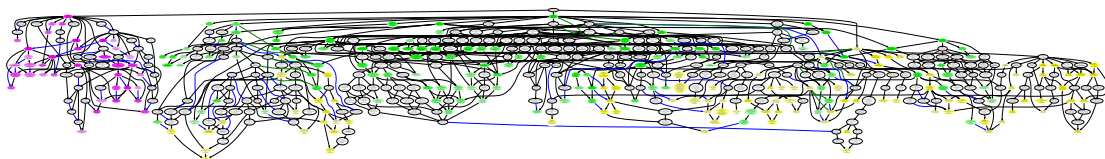

**Supplementary Figure 17. Plot of GO enrichment of contracted gene families along Boa lineage using Ontologizer. Please zoom in for detail.**

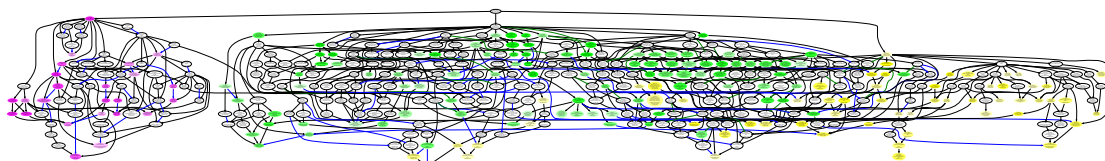

**Supplementary Figure 18. Plot of GO enrichment of expanded gene families along Boa lineage using Ontologizer. Please zoom in for detail.**

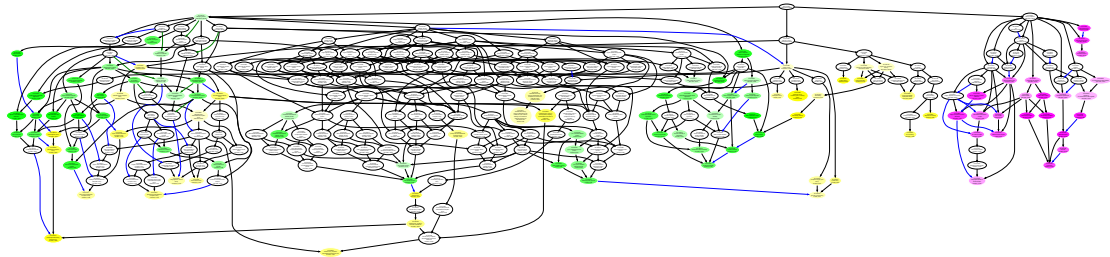

**Supplementary Figure 19. Plot of GO enrichment of contracted gene families along python lineage using Ontologizer.** Please zoom in for detail.

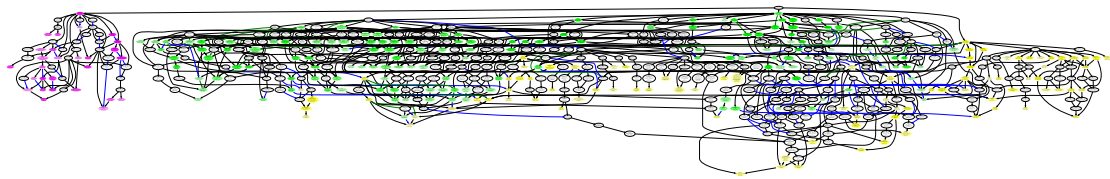

**Supplementary Figure 20. Plot of GO enrichment of expanded gene families along python lineage using Ontologizer.** Please zoom in for detail.

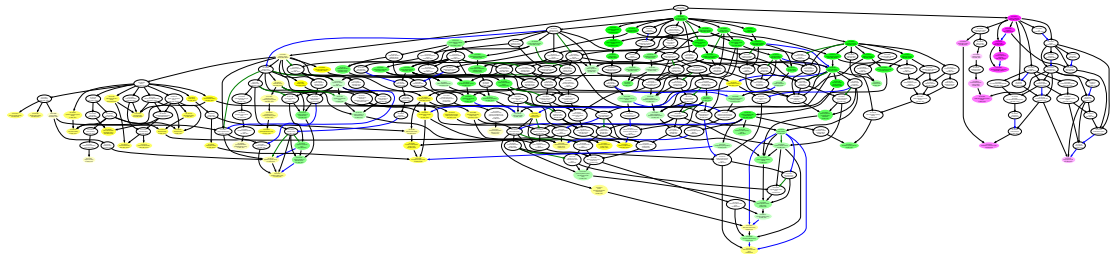

**Supplementary Figure 21. Plot of GO enrichment of contracted gene families along Colubroidea lineage of advanced snakes using Ontologizer.** Please zoom in for detail.

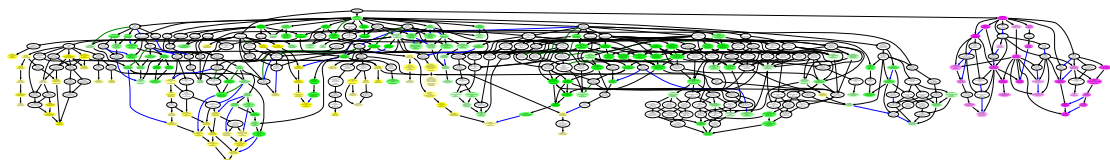

**Supplementary Figure 22. Plot of GO enrichment of expanded gene families along Colubroidea lineage of advanced snakes using Ontologizer.** Please zoom in for detail.

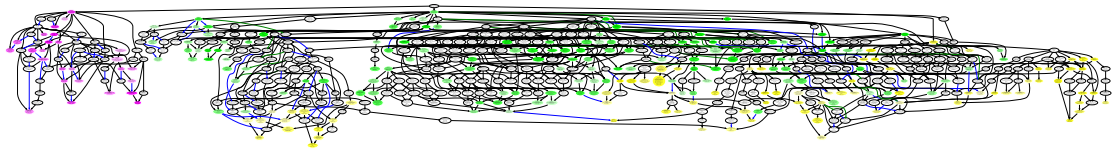

**Supplementary Figure 23. Plot of GO enrichment of contracted gene families along five-pacer viper lineage using Ontologizer. Please zoom in for detail.**

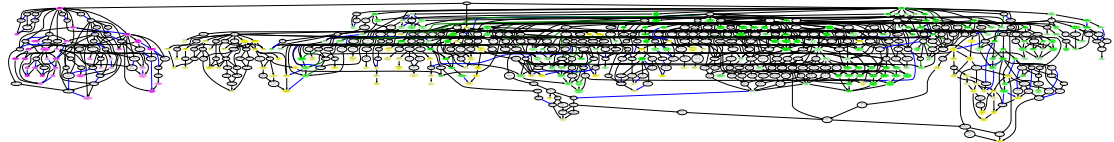

**Supplementary Figure 24. Plot of GO enrichment of expanded gene families along five-pacer viper lineage using Ontologizer. Please zoom in for detail.**

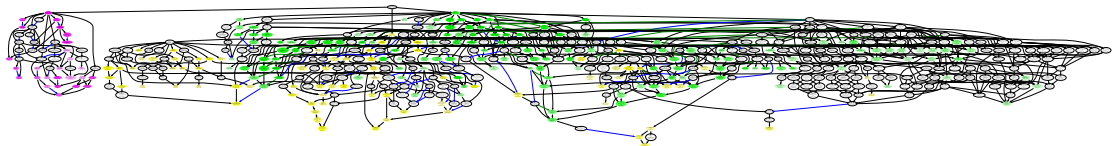

**Supplementary Figure 25. Plot of GO enrichment of contracted gene families along king cobra lineage using Ontologizer. Please zoom in for detail.**

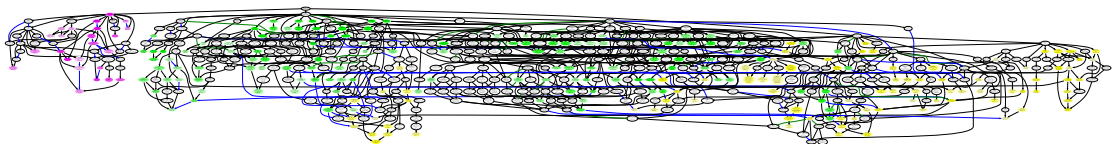

**Supplementary Figure 26. Plot of GO enrichment of expanded gene families along king cobra lineage using Ontologizer. Please zoom in for detail.**

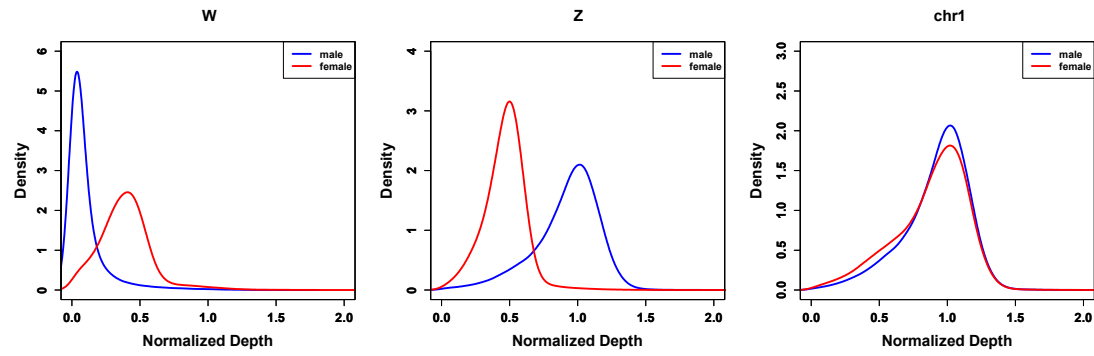

**Supplementary Figure 27. Read coverage density plot of different linkage groups.** For each linkage group (from left to right, chrW, chrZ, chr1), male reads were plotted in blue, and female reads in red. The identified chrW scaffolds in this work all show a female-specific read depth pattern.

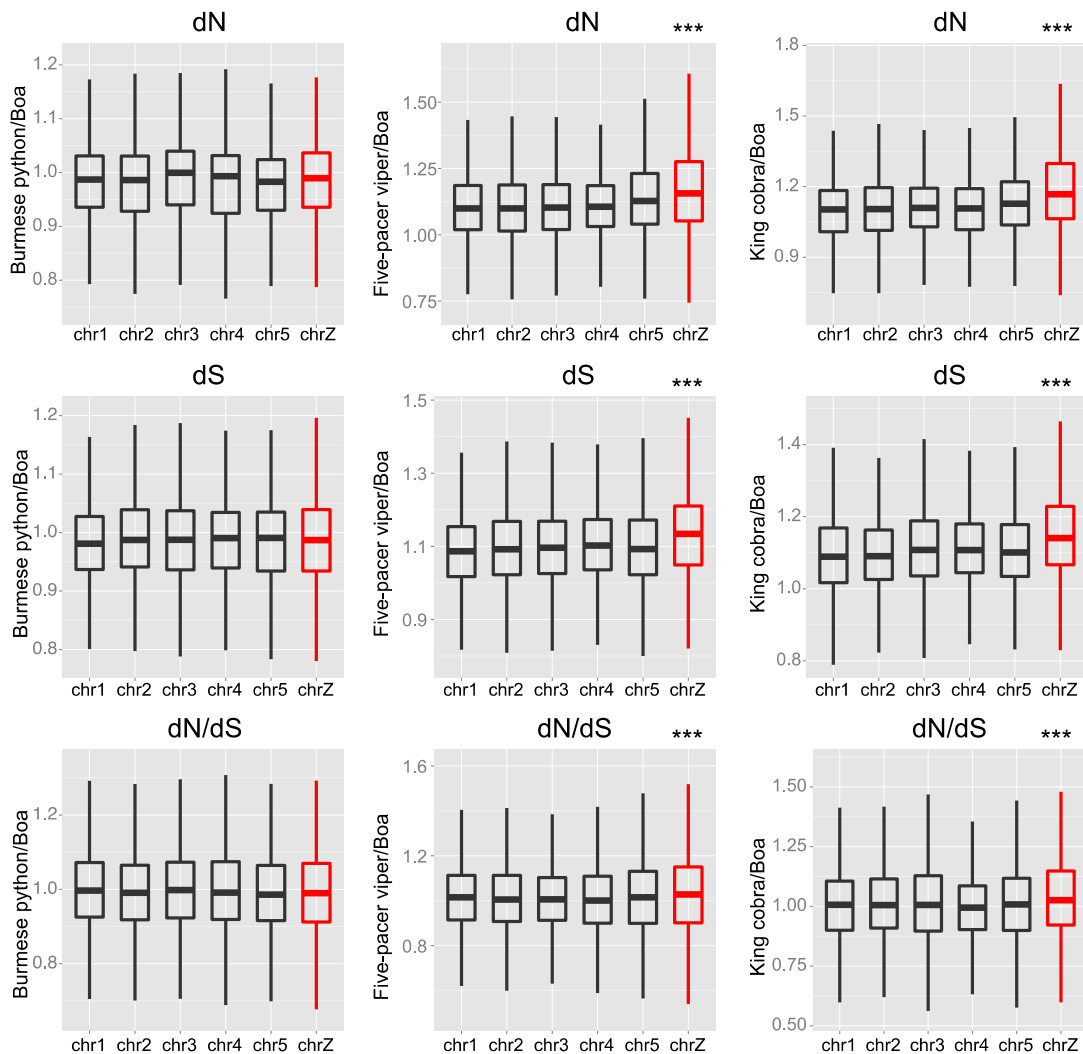

**Supplementary Figure 28. Male-driven evolution effect in snakes.** For each gene, we calculated the substitution rates between anole lizard and each of boa, Burmese python, five-pacer viper and king cobra at synonymous sites (dS) and non-synonymous sites (dN) divided into different chromosome sets. To detect branch-specific differences, we obtained for each gene the ratios of these evolutionary rates between the different snake species vs. boa. Since boa's homologous chromosomal region to the Z chromosomes of other advanced snakes represent the ancestral status of snake sex chromosomes, a higher relative ratios of Z-linked dS of advanced snakes vs. boa than those of autosomes indicate the male-driven evolution effect. We shown the Wilcoxon test significant differences between the Z chromosome and the autosomes (chr1-5) are marked with asterisks (\*\*\*,  $P$ -value < 0.001).



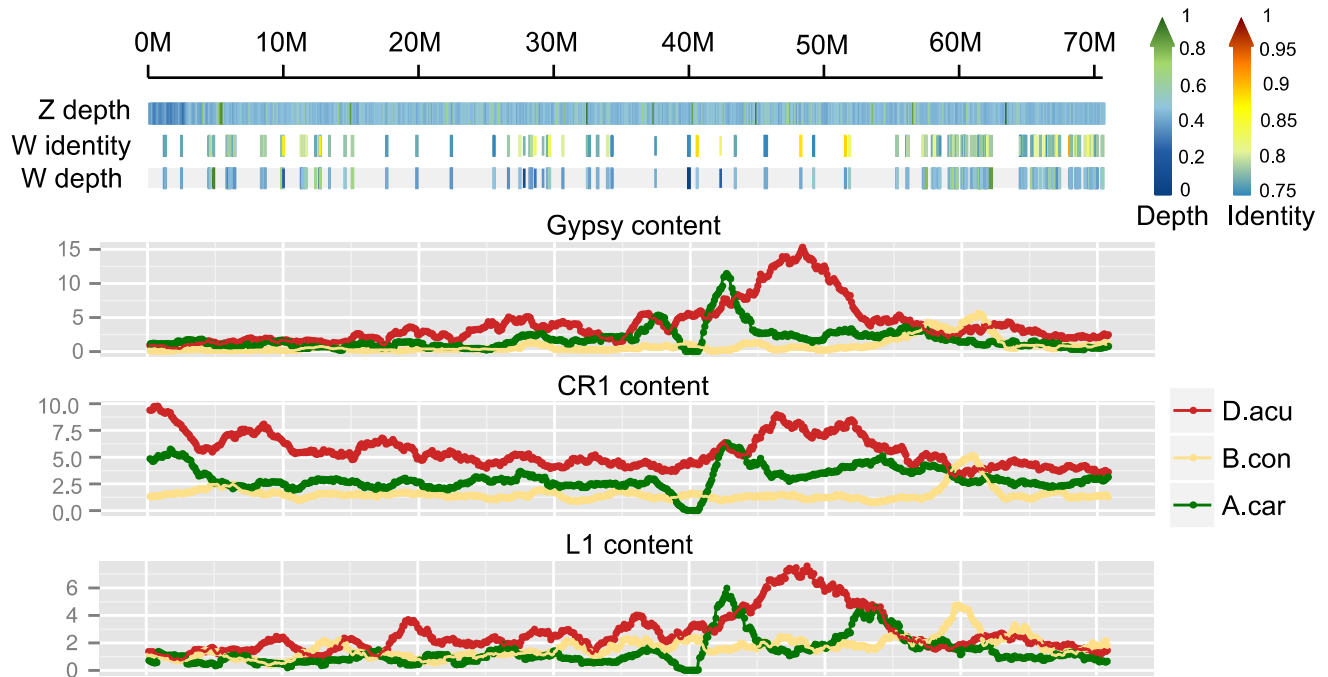

**Supplementary Figure 29. Repeat accumulation along the snake sex chromosomes.** Shown are comparisons of the distribution of Gypsy, CR1 and L1 content along the chromosome in anole lizard, Boa and five-pacer viper. The TE content was calculated by averaging the TE density of each sliding window of 100kb as well as the flanking 10 windows.

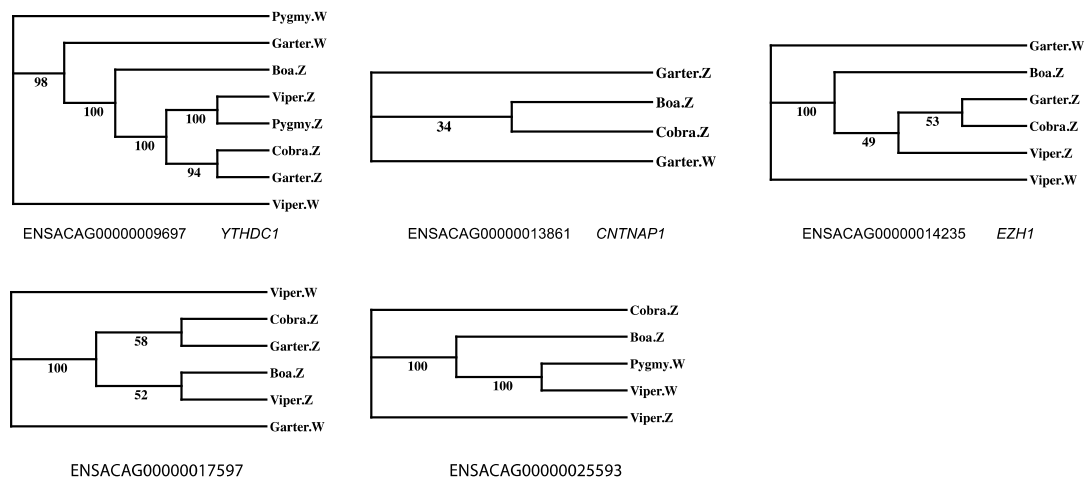

**Supplementary Figure 30. Gene trees for Z and W linked gametologs in S1 region.** Shown are maximum likelihood (ML) trees using coding regions of Z and W allelic sequences from multiple snake species, with the gene name under each tree and bootstrapping values at each node. Trees that show separate clustering of Z- or W-linked gametologs provide strong evidence that these genes suppressed recombination before the speciation.



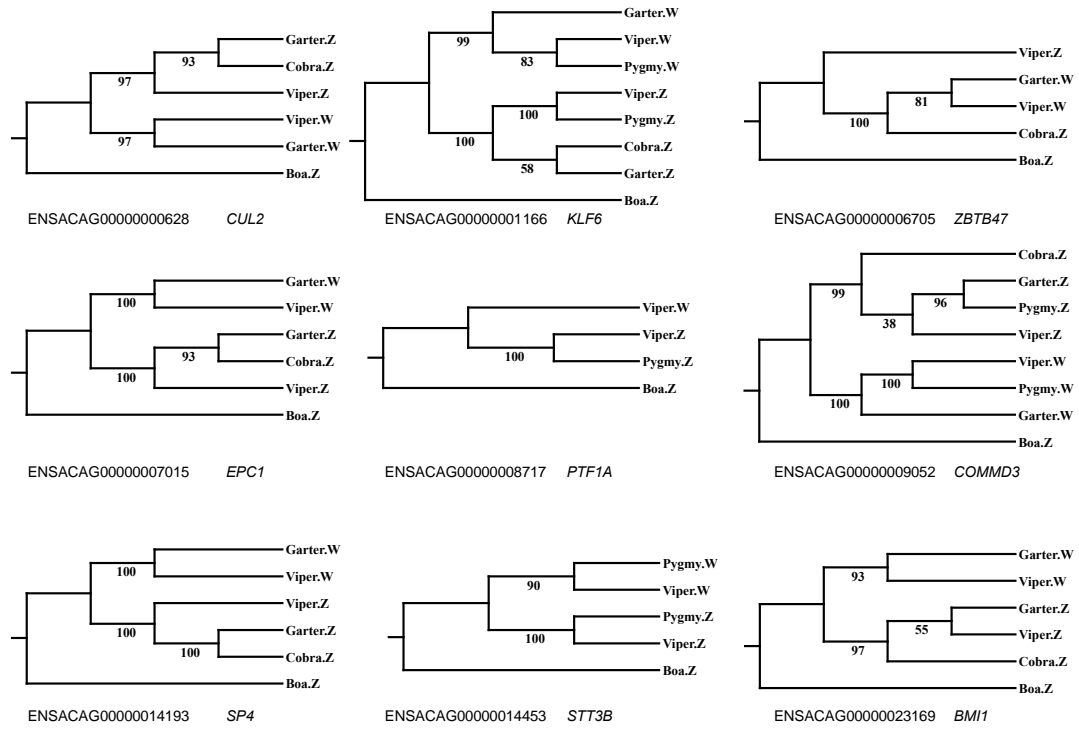

**Supplementary Figure 31. Gene trees for Z and W linked gametologs in S2 region.**

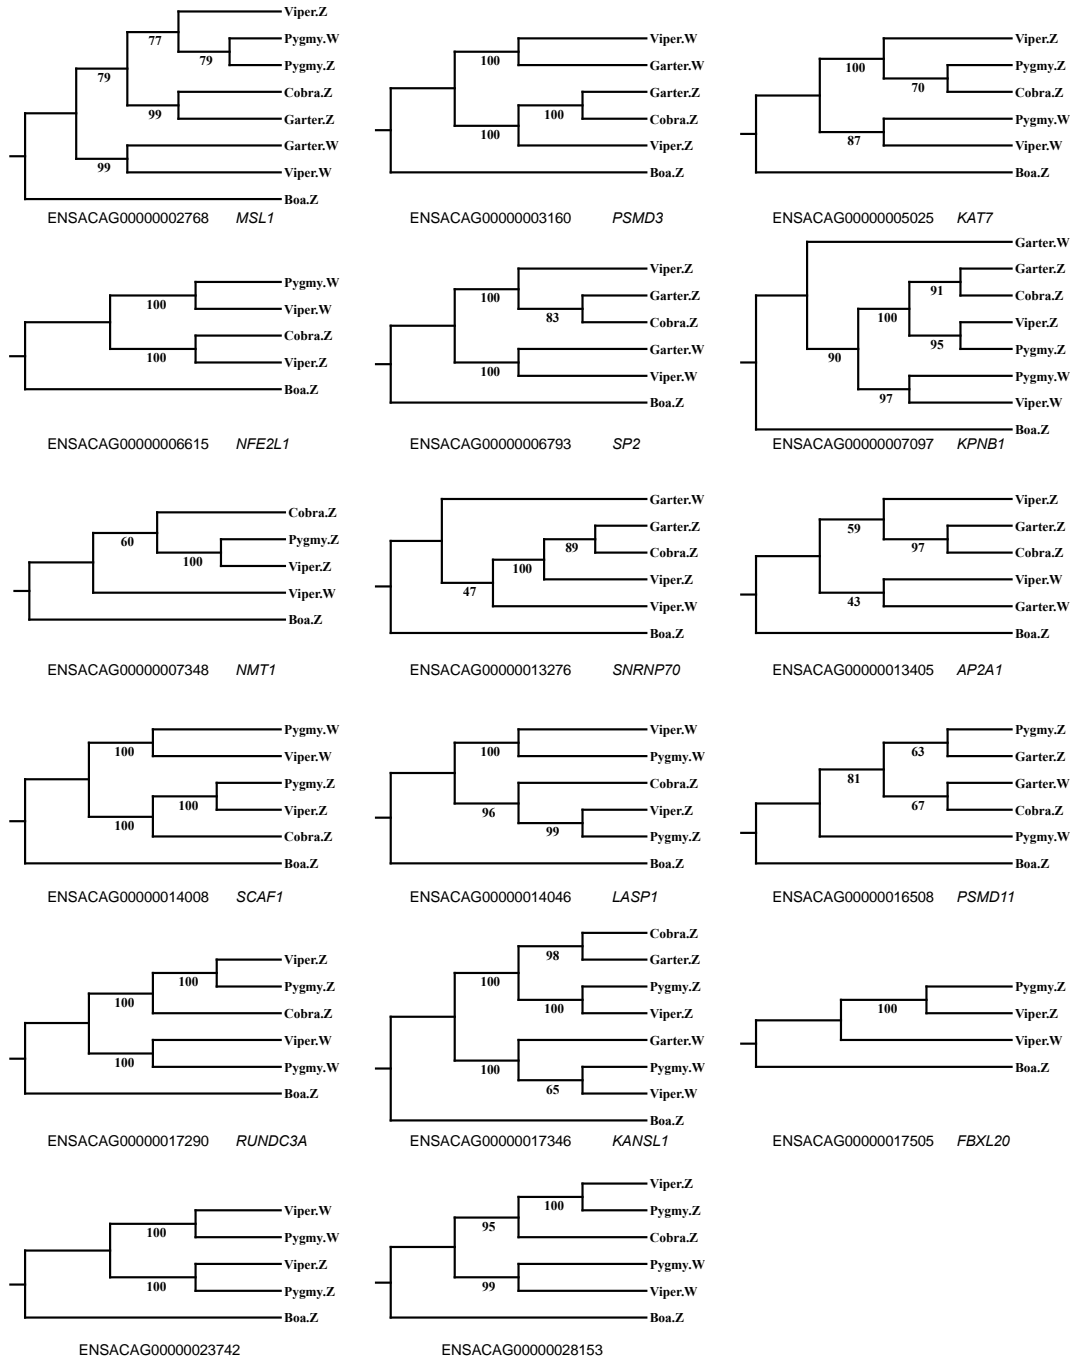

**Supplementary Figure 32. Gene trees for Z and W linked gametologs in S3 region.**

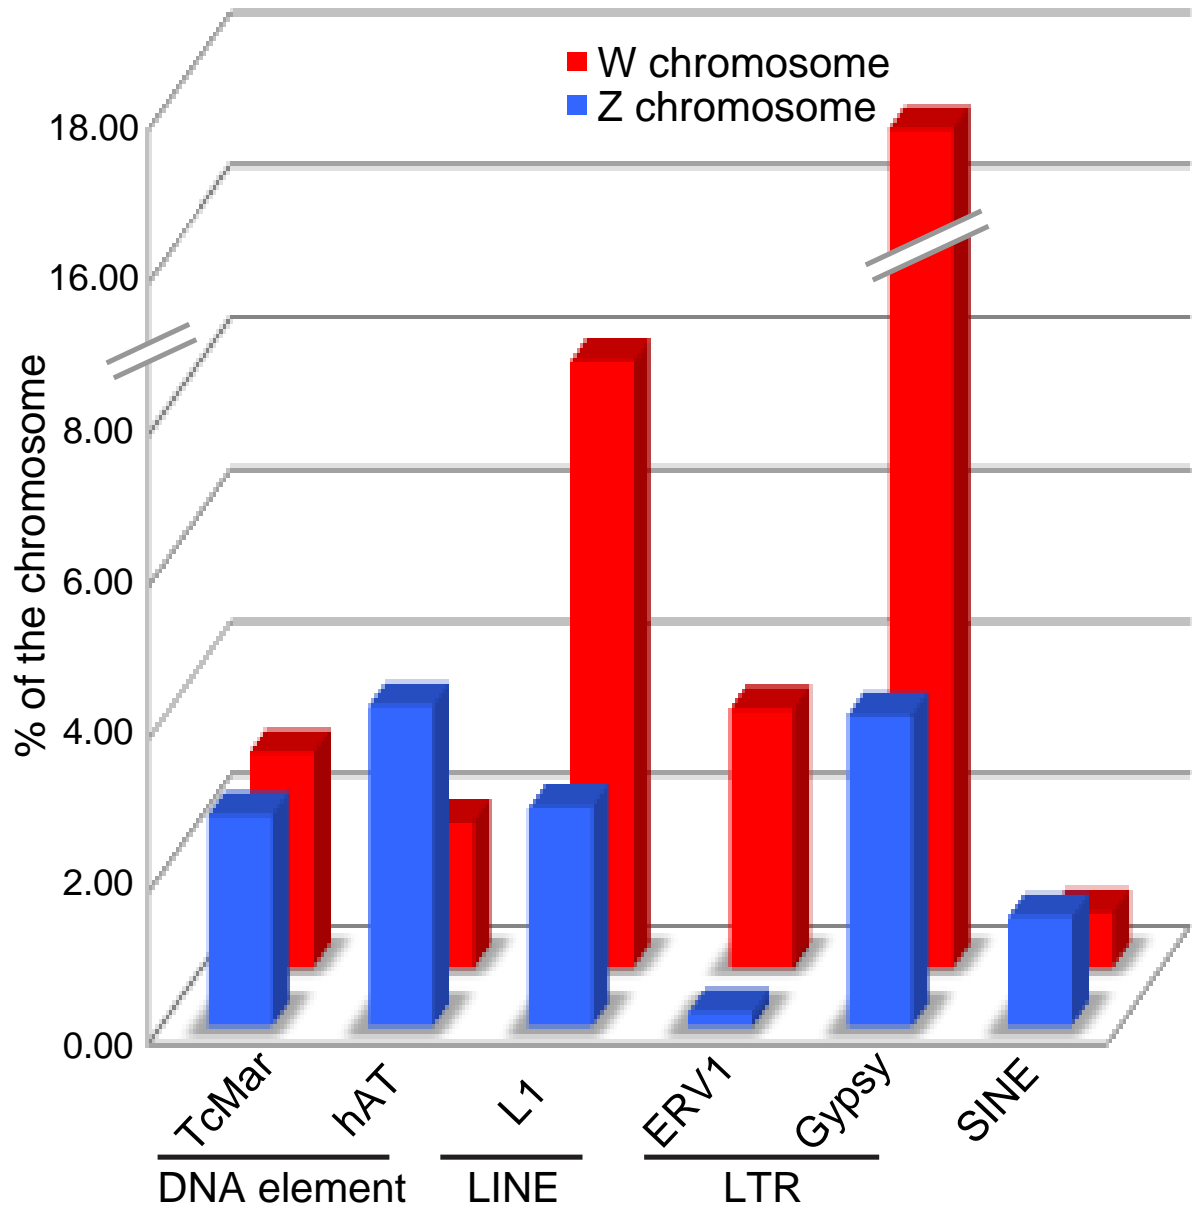

**Supplementary Figure 33. Comparison of repeat content between viper chrZ and chrW.** TE families were determined based on the combined annotations of Repbase, RepeatModeler, and coverage in the genome was annotated using in-house scripts.

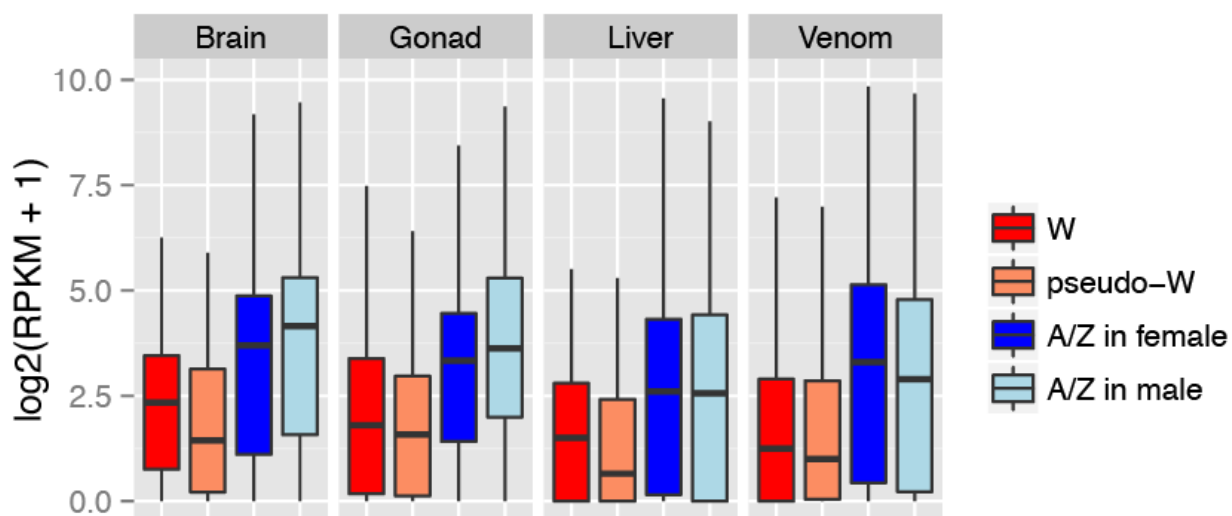

**Supplementary Figure 34. Comparison of gene expression across different chromosomes.** We show gene expression patterns between different chromosome sets across tissues. ‘pseudo-W’ refers to W-linked genes that have premature stop codons or frameshift mutations.

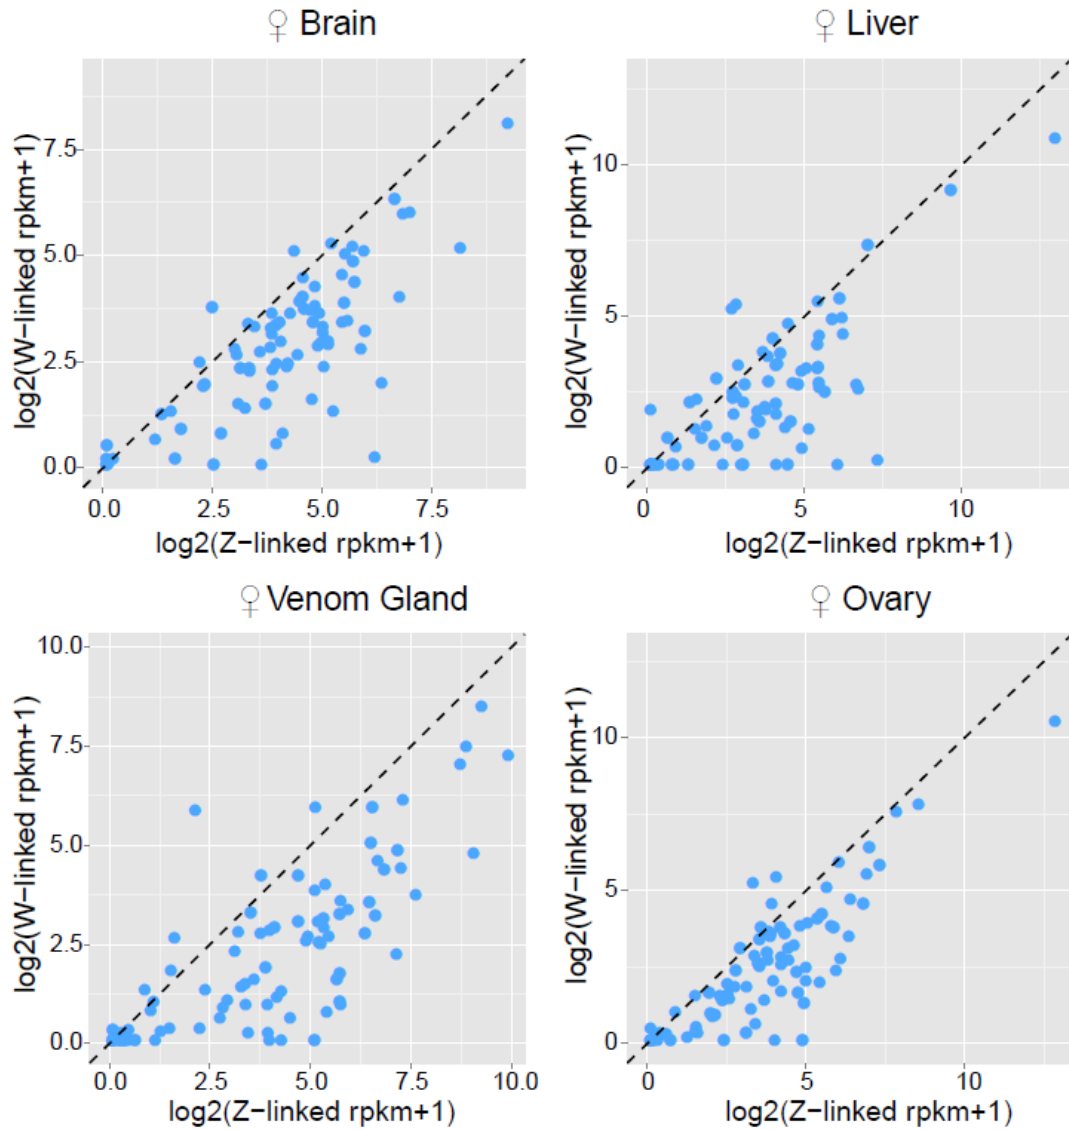

**Supplementary Figure 35. Pairwise comparison of gene expression levels between homologous Z and W alleles.**

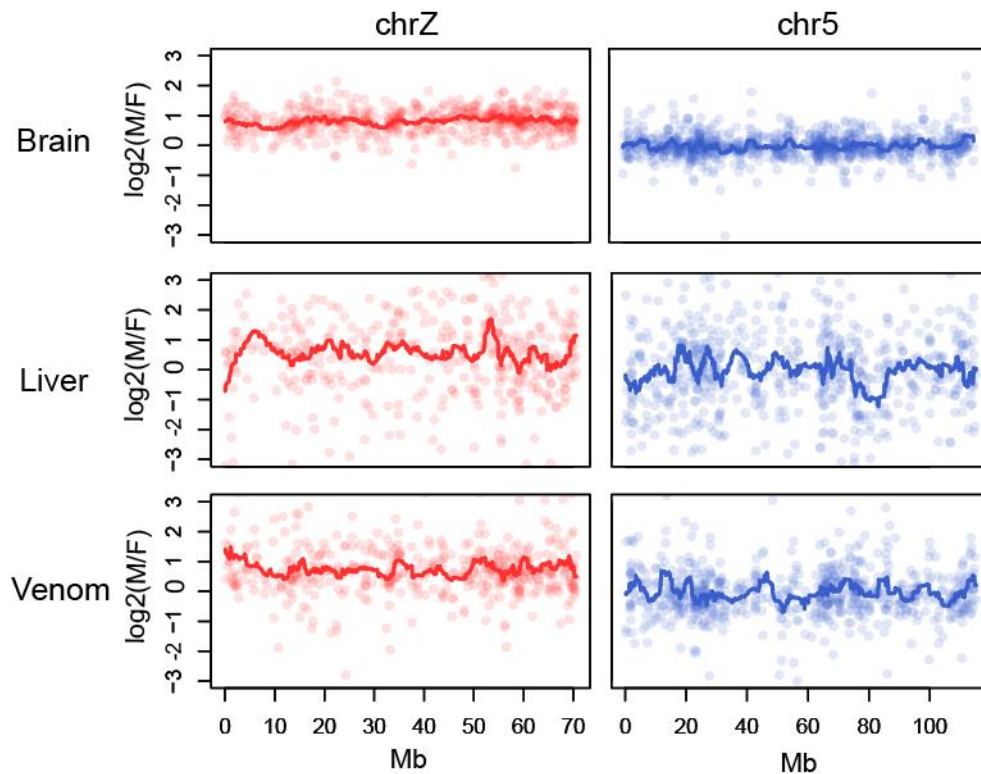

**Supplementary Figure 36. Gene expression along the Z chromosome and autosome chr5 in different tissues of five-pacer viper.** We show log-based male-to-female gene expression ratio along the Z chromosomes and autosome chr5. Only genes with RPKM  $\geq 1$  in both the male and female were considered. If genes are mostly non-biased, the line is expected to centered at 0. The pattern indicates five-pacer viper lacks chromosome-wide dosage compensation.

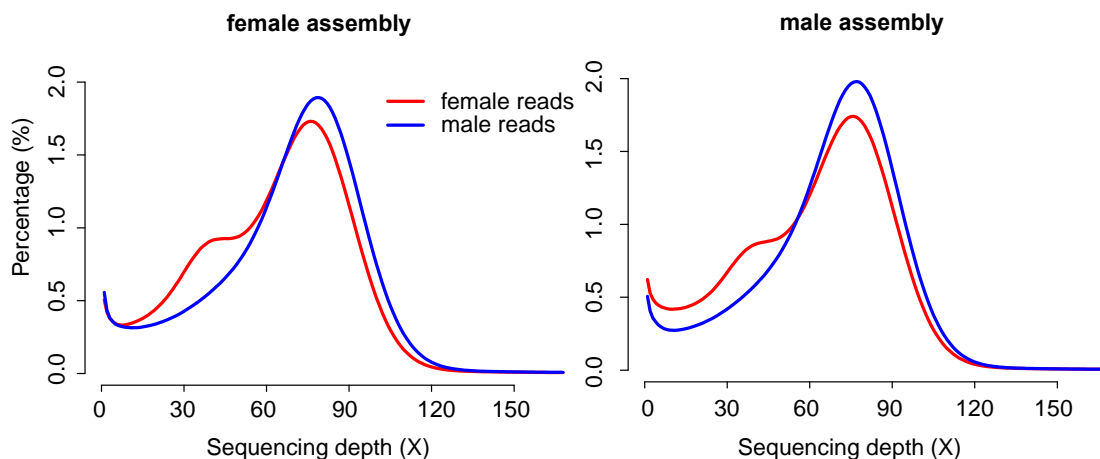

**Supplementary Figure 37. Frequency distribution of sequencing depth.** Distribution of sequencing depth of the assembled female (left) and male (right) genomes by reads from the female and male samples. The peak depth is 76X and 77X for the female and male reads aligned to corresponding assembly, respectively.

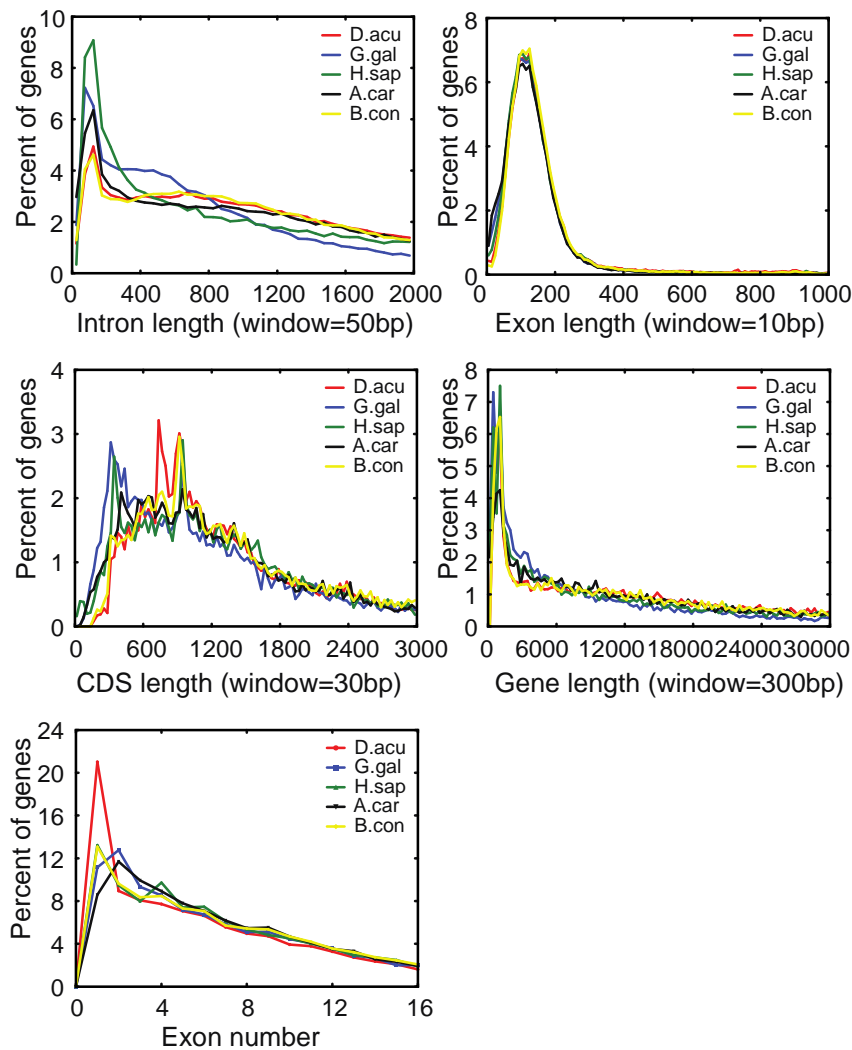

**Supplementary Figure 38. Comparisons of gene parameters among the sequenced representative species.** We used the published genomes of *Gallus gallus*, *Homo sapiens*, *Anolis carolinensis*, *Boa constrictor* to compare with *Deinagkistrodon acutus*, without finding any obvious differences between them and five-pacer viper in the annotated genes' length and number. This indicates the high quality of gene annotation.

## Supplementary Tables

**Supplementary Table 1. Statistics of five-pacer viper genome sequencing.**

| Sex          | Insert Size (bp) | # Library | Read Length (bp) | Raw data        |                         | Clean data      |                         |
|--------------|------------------|-----------|------------------|-----------------|-------------------------|-----------------|-------------------------|
|              |                  |           |                  | Total Data (Gb) | Sequence coverage (X) * | Total Data (Gb) | Sequence coverage (X) * |
| Female       | 250              | 1         | 150              | 60.14           | 40.09                   | 32.68           | 21.78                   |
|              | 500              | 1         | 150              | 61.46           | 40.97                   | 39.09           | 26.06                   |
|              | 800              | 1         | 150              | 51.97           | 34.64                   | 31.06           | 20.7                    |
|              | 2,000            | 2         | 49               | 42.42           | 28.28                   | 23.39           | 15.59                   |
|              | 5,000            | 1         | 49               | 18.63           | 12.42                   | 4.35            | 2.9                     |
|              | 6,000            | 1         | 49               | 20.19           | 13.46                   | 4.67            | 3.11                    |
|              | 10,000           | 2         | 49               | 37.51           | 25.01                   | 6.42            | 4.28                    |
|              | 20,000           | 2         | 49               | 26.85           | 17.91                   | 2.75            | 1.83                    |
|              | 40,000           | 2         | 49               | 37.47           | 24.98                   | 4.08            | 2.72                    |
| <b>Total</b> | -                | 13        | -                | 356.64          | 237.76                  | 148.49          | 98.97                   |
| Male         | 250              | 1         | 150              | 59.53           | 39.68                   | 40.09           | 26.73                   |
|              | 500              | 1         | 100              | 68.03           | 45.36                   | 42.79           | 28.52                   |
|              | 800              | 1         | 100              | 43.68           | 29.12                   | 26.32           | 17.55                   |
| <b>Total</b> | -                | 3         | -                | 171.24          | 114.16                  | 109.20          | 72.80                   |

\*Coverage calculation was based on the estimated genome size of 1.5 Gb.

**Supplementary Table 2. Statistics of 17-mer analysis.**

| Sex    | Kmer | Kmer number    | Peak depth | Genome size (bp) | Used base      | Used read number | Depth |
|--------|------|----------------|------------|------------------|----------------|------------------|-------|
| Female | 17   | 59,943,333,424 | 46         | 1,303,115,944    | 69,165,384,720 | 576,378,206      | 53    |
| Male   | 17   | 54,173,801,298 | 38         | 1,425,626,349    | 67,339,337,970 | 822,846,042      | 47    |



**Supplementary Table 3. Statistics of reads of small-insert and large-insert libraries aligned to the male assembly.** *PE mapped* refer to reads being mapped to the genome as read pairs, and *SE mapped* represent reads being mapped to the genome as single reads.

| Type         | Insert Size (bp) | Read Length (bp) | Total reads | Mapped reads | Mapped ratio (%) | PE mapped ratio (%) | Calibrated PE mapped ratio (%) <sup>*</sup> | SE mapped ratio (%) | Uniq mapped ratio (%) |
|--------------|------------------|------------------|-------------|--------------|------------------|---------------------|---------------------------------------------|---------------------|-----------------------|
| Female reads | 250              | 120              | 255,383,662 | 247,059,568  | 96.74            | 95.10               | -                                           | 4.90                | 90.22                 |
|              | 500              | 120              | 319,108,900 | 309,556,616  | 97.01            | 93.90               | -                                           | 6.10                | 89.34                 |
|              | 800              | 120              | 257,269,306 | 249,274,823  | 96.89            | 92.27               | -                                           | 7.73                | 90.21                 |
|              | 2k               | 49               | 477,161,694 | 427,409,464  | 89.57            | 77.96               | 99.36                                       | 22.04               | 73.12                 |
|              | 5k               | 49               | 88,870,168  | 78,884,097   | 88.76            | 67.43               | 99.24                                       | 32.57               | 74.55                 |
|              | 6k               | 49               | 95,301,926  | 84,284,998   | 88.44            | 71.34               | 99.24                                       | 28.66               | 73.77                 |
|              | 10k              | 49               | 130,916,650 | 115,299,778  | 88.07            | 67.94               | 98.14                                       | 32.06               | 73.17                 |
|              | 20k              | 49               | 56,057,596  | 46,898,875   | 83.66            | 57.78               | 94.98                                       | 42.22               | 75.87                 |
|              | 40k              | 49               | 83,321,414  | 69,873,388   | 83.86            | 57.66               | 95.56                                       | 42.34               | 76.42                 |
| Male reads   | 250              | 135              | 296,994,588 | 289,619,546  | 97.52            | 96.08               | -                                           | 3.91                | 92.17                 |
|              | 500              | 75;85;85         | 524,283,572 | 517,080,772  | 98.63            | 93.66               | -                                           | 6.34                | 89.03                 |
|              | 800              | 75;85            | 319,511,682 | 313,958,573  | 98.26            | 91.50               | -                                           | 8.50                | 88.66                 |

\* Paired-end reads from large-insert libraries without the expected insert size were excluded.

**Supplementary Table 4. Summary of the five-pacer viper genome assemblies.**

| Female Sample                   | Contig        |         | Scaffold      |         |
|---------------------------------|---------------|---------|---------------|---------|
|                                 | Size (bp)     | Number  | Size (bp)     | Number  |
| <b>N90</b>                      | 5,029         | 61,647  | 231,031       | 977     |
| <b>N80</b>                      | 9,741         | 41,413  | 647,881       | 592     |
| <b>N70</b>                      | 14,673        | 29,372  | 1,043,674     | 405     |
| <b>N60</b>                      | 20,262        | 20,992  | 1,543,103     | 284     |
| <b>N50</b>                      | 26,709        | 14,785  | 2,018,329     | 197     |
| <b>Longest</b>                  | 305,908       | -       | 12,996,529    | -       |
| <b>Total Size</b>               | 1,445,656,001 | -       | 1,526,360,084 | -       |
| <b>Total Number (&gt;=100b)</b> | -             | 297,390 | -             | 183,158 |
| <b>Total Number (&gt;=2kb)</b>  | -             | 85,344  | -             | 4,414   |
| <b>Gap ratio</b>                | -             | 0%      | -             | 5.29%   |

| Male Sample                     | Contig        |         | Scaffold      |         |
|---------------------------------|---------------|---------|---------------|---------|
|                                 | Size (bp)     | Number  | Size (bp)     | Number  |
| <b>N90</b>                      | 4,457         | 69,307  | 340,274       | 825     |
| <b>N80</b>                      | 8,527         | 47,209  | 735,115       | 532     |
| <b>N70</b>                      | 12,634        | 33,854  | 1,194,490     | 375     |
| <b>N60</b>                      | 17,208        | 24,413  | 1,647,315     | 270     |
| <b>N50</b>                      | 22,424        | 17,322  | 2,122,253     | 192     |
| <b>Longest</b>                  | 219,659       | -       | 11,788,169    | -       |
| <b>Total Size</b>               | 1,390,821,802 | -       | 1,473,404,408 | -       |
| <b>Total Number (&gt;=100b)</b> | -             | 287,757 | -             | 160,256 |
| <b>Total Number (&gt;=2kb)</b>  | -             | 93,050  | -             | 2,912   |
| <b>Gap ratio</b>                | -             | 0%      | -             | 5.61%   |

**Supplementary Table 5. Number of expressed genes of five-pacer viper.**

| Tissue        | RPKM>0 |           | RPKM>1 |           | RPKM>5 |           |
|---------------|--------|-----------|--------|-----------|--------|-----------|
|               | Number | Ratio (%) | Number | Ratio (%) | Number | Ratio (%) |
| ♀ Brain       | 18545  | 87.50     | 14060  | 66.34     | 9879   | 46.61     |
| ♂ Brain       | 18407  | 86.85     | 14284  | 67.40     | 10092  | 47.62     |
| ♀ Liver       | 13428  | 63.36     | 10971  | 51.76     | 7319   | 34.53     |
| ♂ Liver       | 12910  | 60.91     | 11140  | 52.56     | 7497   | 35.37     |
| ♂ Venom Gland | 15055  | 71.03     | 11478  | 54.16     | 8100   | 38.22     |
| ♀ Venom Gland | 15234  | 71.88     | 11382  | 53.70     | 7855   | 37.06     |
| Ovary         | 16858  | 79.54     | 12395  | 58.48     | 8574   | 40.45     |
| Testis        | 17366  | 81.94     | 12780  | 60.30     | 9017   | 42.55     |
| Union         | 19556  | 92.27     | 17134  | 80.84     | 13873  | 65.45     |

Gene expression levels were measured by RPKM (Reads Per Kilobase of gene per Million mapped reads).

**Supplementary Table 6. Number of genes and scaffold size organised into chromosomes.**

| Feature  | Species | Total number | # organized into chromosomes | Percent (%) | Total length (bp) | Chromosomal Length (bp) | Percent (%) |
|----------|---------|--------------|------------------------------|-------------|-------------------|-------------------------|-------------|
| Gene     | Viper   | 21,194       | 10,209                       | 48.17       | 514,584,937       | 293,178,923             | 56.97       |
|          | Boa     | 17,392       | 9,154                        | 52.63       | 475,414,698       | 293,509,235             | 61.74       |
| Scaffold | Viper   | 160,256      | 629                          | 0.39        | 1,473,404,408     | 832,463,815             | 56.50       |
|          | Boa     | 19,927       | 312                          | 1.57        | 1,442,930,293     | 912,024,139             | 63.21       |

**Supplementary Table 7. Comparison of repeat content between snakes and lizard.**

| Type           | Anole lizard |          | Boa         |          | Burmese python |          | Five-pacer viper |          | King cobra  |          |
|----------------|--------------|----------|-------------|----------|----------------|----------|------------------|----------|-------------|----------|
|                | Length (Mb)  | % genome | Length (Mb) | % genome | Length (Mb)    | % genome | Length (Mb)      | % genome | Length (Mb) | % genome |
| <b>DNA</b>     | 260.26       | 14.47    | 43.62       | 3.02     | 39.24          | 2.73     | 117.35           | 7.96     | 60.75       | 3.81     |
| <b>LINE</b>    | 274.63       | 15.26    | 188.07      | 13.03    | 185.52         | 12.93    | 203.93           | 13.84    | 196.80      | 12.35    |
| <b>LTR</b>     | 87.32        | 4.85     | 20.82       | 1.44     | 8.30           | 0.58     | 38.15            | 2.59     | 25.08       | 1.57     |
| <b>SINE</b>    | 105.32       | 5.85     | 38.81       | 2.69     | 26.44          | 1.84     | 26.85            | 1.82     | 33.24       | 2.08     |
| <b>Unknown</b> | 279.08       | 15.51    | 266.22      | 18.45    | 242.79         | 16.92    | 286.15           | 19.42    | 194.44      | 12.2     |
| <b>Other</b>   | 36.44        | 2.03     | 28.51       | 1.98     | 26.54          | 1.85     | 46.65            | 3.17     | 41.11       | 2.58     |
| <b>Total</b>   | 1,003.8      | 55.79    | 571.21      | 39.59    | 514.26         | 35.84    | 699.38           | 47.47    | 541.15      | 33.95    |

**Supplementary Table 8. Comparison of genome assembly quality between snakes and lizard.**

| Species          | Genome Size (bp) | Scaffold N50 (bp) | Total Gap Length (bp) | Length percent (%) |
|------------------|------------------|-------------------|-----------------------|--------------------|
| Anole lizard     | 1,799,143,587    | 150,641,573       | 97,807,040            | 5.44               |
| Boa              | 1,442,930,293    | 4,505,203         | 55,688,379            | 3.86               |
| Five-pacer viper | 1,473,404,408    | 2,122,253         | 82,553,359            | 5.60               |
| King cobra       | 1,594,074,654    | 241,519           | 215,162,447           | 13.50              |
| Burmese python   | 1,435,034,535    | 213,970           | 50,501,725            | 3.52               |

**Supplementary Table 9. Comparison of venom genes between snakes.** Statistics of venom gene families in the four snakes and anole lizard genomes based on homology-based prediction. AVIT: Prokineticin; C3: complement C3; CVF: Cobra Venom Factor; CRISPs: Cysteine-Rich Secretory Proteins; Hy: Hyaluronidases; Natriuretic: Natriuretic peptide; NGF: Snake Venom Nerve Growth Factors; PLA2-2A: Snake Venom Phospholipase A2 (type IIA); SVMP: Snake Venom Metalloproteinases; TL: thrombin-like snake venom serine proteinases; LAAO: Snake Venom L-Amino Acid Oxidases; PDE: phosphodiesterases; CLPs: snake C-type lectin-like proteins; VEGF: vascular endothelin growth factor; PLA2-1B: Snake Venom Phospholipase A2 (type IB); 3FTX: The three-finger toxins; AChE: Acetylcholinesterase;

| <b>Venom Gene Family</b> | <b>Anole lizard</b> | <b>Boa</b> | <b>Burmese python</b> | <b>Five-pacer viper</b> | <b>King cobra</b> |
|--------------------------|---------------------|------------|-----------------------|-------------------------|-------------------|
| 5' nucleotidase          | 1                   | 1          | 1                     | 1                       | 1                 |
| AVIT                     | 2                   | 2          | 2                     | 2                       | 2                 |
| Prokineticin             | 6                   | 1          | 4                     | 3                       | 1                 |
| CVF                      | -                   | -          | -                     | -                       | 1                 |
| CRISPs                   | 2                   | 1          | 1                     | 2                       | 3                 |
| Crotamine                | -                   | -          | -                     | -                       | 1                 |
| Cystatin                 | 2                   | 3          | 4                     | 5                       | 4                 |
| Hy                       | 5                   | 6          | 6                     | 6                       | 6                 |
| Kallikrein               | 7                   | 7          | 1                     | 1                       | 3                 |
| Natriuretic              | 1                   | 3          | 1                     | 2                       | 6                 |
| NGF                      | 5                   | 5          | 5                     | 4                       | 5                 |
| Veficolin                | 11                  | 9          | 9                     | 10                      | 11                |
| Ficolin                  | 6                   | 2          | 4                     | 5                       | 5                 |
| Vespryn                  | 66                  | 28         | 43                    | 28                      | 30                |
| PLA2-2A                  | 1                   | 4          | 3                     | 3                       | 3                 |
| Waglerin                 | -                   | -          | -                     | -                       | -                 |
| SVMP_I                   | -                   | 2          | -                     | 1                       | -                 |
| SVMP_II                  | -                   | 1          | -                     | 4                       | 5                 |
| SVMP_III                 | 1                   | 1          | 2                     | 5                       | 4                 |
| TL                       | 4                   | 6          | 7                     | 22                      | 8                 |
| LAAO                     | 4                   | 5          | 6                     | 4                       | 3                 |
| PDE                      | 6                   | 6          | 5                     | 5                       | 5                 |
| CLPs                     | 5                   | 7          | 6                     | 22                      | 13                |
| VEGF                     | 4                   | 7          | 7                     | 6                       | 5                 |
| Kunitz                   | 86                  | 39         | 49                    | 70                      | 53                |
| Disintegrin_small        | -                   | -          | -                     | -                       | -                 |
| Disintegrin_dimeric      | -                   | -          | -                     | 3                       | -                 |
| Disintegrin_medium       | -                   | -          | -                     | -                       | -                 |
| Disintegrin_long         | -                   | -          | -                     | -                       | -                 |
| Ohanin-like              | 24                  | 12         | 9                     | 14                      | 9                 |

|             |     |     |     |     |     |
|-------------|-----|-----|-----|-----|-----|
| factorV     | 5   | 5   | 6   | 5   | 5   |
| factorX     | 9   | 11  | 11  | 11  | 11  |
| Sarafotoxin | -   | -   | 1   | -   | -   |
| Waprin      | 5   | 3   | 3   | 3   | 4   |
| PLA2-1B     | 1   | 1   | 1   | 1   | 4   |
| 3FTX        | -   | -   | -   | -   | 5   |
| ACeH        | 22  | 11  | 12  | 14  | 16  |
| Fasciculin  | -   | -   | -   | -   | -   |
| Total       | 291 | 189 | 209 | 262 | 232 |

**Supplementary Table 10. Comparison of repeat content between snake sex chromosomes and their lizard homolog.**

| Type           | Anole lizard chr6 |       | Five-pacer viper chrW |       | Five-pacer viper chrZ |       |
|----------------|-------------------|-------|-----------------------|-------|-----------------------|-------|
|                | Length (bp)       | % chr | Length (bp)           | % chr | Length (bp)           | % chr |
| <b>DNA</b>     | 11,737,911        | 14.54 | 1,826,436             | 5.55  | 5,747,404             | 7.47  |
| <b>LINE</b>    | 10,617,133        | 13.15 | 5,753,245             | 17.48 | 11,492,465            | 14.94 |
| <b>LTR</b>     | 2,624,820         | 3.25  | 7,585,819             | 23.05 | 4,249,320             | 5.52  |
| <b>SINE</b>    | 4,761,017         | 5.90  | 236,666               | 0.72  | 1,107,788             | 1.44  |
| <b>Unknown</b> | 11,284,661        | 13.98 | 5,468,061             | 16.62 | 16,025,829            | 20.83 |
| <b>Other</b>   | 1,274,093         | 1.58  | 510,501               | 1.55  | 1,679,359             | 2.18  |
| <b>Total</b>   | 40,548,961        | 50.22 | 21,109,049            | 64.15 | 39,459,838            | 51.29 |

**Supplementary Table 11. Location of W-linked putative pseudogenes.**

| Gene type       | # Deleted/not detected |     |     | # Frameshift/premature stop codons |    |    | # Putatively functional |     |     |
|-----------------|------------------------|-----|-----|------------------------------------|----|----|-------------------------|-----|-----|
|                 | S1                     | S2  | S3  | S1                                 | S2 | S3 | S1                      | S2  | S3  |
| <b>Z-linked</b> | 0                      | 0   | 0   | 21                                 | 15 | 3  | 218                     | 447 | 269 |
| <b>W-linked</b> | 231                    | 440 | 231 | 3                                  | 14 | 17 | 5                       | 8   | 24  |

**Supplementary Table 12. Fractions of bases covered by reads in the male assembly.**

| Type         | Fractions of bases covered by $\geq N$ reads |          |          |           |
|--------------|----------------------------------------------|----------|----------|-----------|
|              | $\geq 1$                                     | $\geq 2$ | $\geq 5$ | $\geq 10$ |
| Female reads | 97.94                                        | 97.44    | 96.26    | 94.54     |
| Male reads   | 99.26                                        | 98.83    | 97.9     | 96.69     |

**Supplementary Table 13. Characteristics of predicted protein-coding genes in the male assembly.**

| Gene set                   | Total  | Intact ORF | Single exon gene | Gene length (bp) | mRNA length (bp) | Exons per gene | Exon length (bp) | Intron length (bp) |
|----------------------------|--------|------------|------------------|------------------|------------------|----------------|------------------|--------------------|
| <i>Anolis carolinensis</i> | 16,861 | 2,587      | 2,049            | 20,351           | 1,523            | 8.37           | 182              | 2,556              |
| <i>Gallus gallus</i>       | 13,680 | 2,204      | 1,799            | 24,377           | 1,553            | 9.02           | 172              | 2,846              |
| <i>Homo sapiens</i>        | 14,646 | 2,773      | 1,631            | 28,042           | 1,688            | 9.71           | 174              | 3,024              |
| <b>Combined</b>            | 18,624 | 3,339      | 2,718            | 23,470           | 1,569            | 8.63           | 182              | 2,871              |
| <b>De novo prediction</b>  | 36,275 | 36,275     | 9,448            | 13,822           | 1,055            | 5.07           | 208              | 3,134              |
| <b>Transcriptome</b>       | 41,917 | 26,564     | 23,833           | 6,660            | 884              | 4.21           | 210              | 1,801              |
| <b>Merged</b>              | 21,194 | 13,368     | 4,089            | 22,010           | 1,583            | 8.39           | 189              | 2,763              |

**Supplementary Table 14. Number of predicted genes that can find homologs in the Ensembl library with different aligning rate cutoff.** Alignment rate was calculated by dividing the aligned length vs. the original protein length. And we required both the query and subject to satisfy our alignment cutoff. The Ensembl library consists of all proteins from *Anolis carolinensis*, *Gallus gallus*, *Homo sapiens*, *Xenopus tropicalis* and *Danio rerio*.

| Database | total  | Aligning rate cutoff |        |        |
|----------|--------|----------------------|--------|--------|
|          |        | >30%                 | >50%   | >80%   |
| Ensembl  | 21,194 | 19,845               | 19,292 | 17,201 |

**Supplementary Table 15. Data production and alignment statistic of RNA-Seq aligned to male genome assembly.**

| Sample           | # Raw reads | Raw bases (Gb) | # Map reads | Map bases (Gb) | Map ratio (%) | # uniqMap reads | UniqMap ratio (%) |
|------------------|-------------|----------------|-------------|----------------|---------------|-----------------|-------------------|
| ♀ Brain          | 115826248   | 10.42          | 77507446    | 6.98           | 66.92         | 74903732        | 96.64             |
| ♂ Brain          | 107723070   | 9.70           | 72412864    | 6.52           | 67.22         | 70025236        | 96.70             |
| ♀ Liver          | 117738368   | 11.78          | 77140112    | 7.71           | 65.51         | 73319729        | 95.05             |
| ♂ Liver          | 123319650   | 12.34          | 66982630    | 6.70           | 54.32         | 63883716        | 95.38             |
| ♂<br>Venom Gland | 74259730    | 7.43           | 46025775    | 4.60           | 61.98         | 44533286        | 96.76             |
| ♀<br>Venom Gland | 90752140    | 9.08           | 50146194    | 5.01           | 55.26         | 48034755        | 95.79             |
| Ovary            | 72357522    | 7.24           | 50456739    | 5.05           | 69.73         | 48785763        | 96.69             |
| Testis           | 96992408    | 8.73           | 69370277    | 6.24           | 71.52         | 67665198        | 97.54             |

**Supplementary Table 16. Statistics of the identified Z-linked scaffolds.**

| Z-linked scaffolds              | Size (bp)  | Number |
|---------------------------------|------------|--------|
| <b>N90</b>                      | 301,572    | 80     |
| <b>N50</b>                      | 962,372    | 25     |
| <b>Longest</b>                  | 2,903,481  | -      |
| <b>Total Size</b>               | 76,929,177 | -      |
| <b>Total Number (&gt;=100b)</b> | -          | 139    |
| <b>Total Number (&gt;=2kb)</b>  | -          | 139    |
| <b>Annotated gene number</b>    | -          | 1,135  |

**Supplementary Table 17. Statistics of SNPs identified in the female and male individual.**

| Chromosome | SNP     | Female    |          | Male      |          |
|------------|---------|-----------|----------|-----------|----------|
|            |         | Number    | Rate (%) | Number    | Rate (%) |
| Autosome   | Hetero- | 1,373,796 | 0.11     | 1,333,210 | 0.10     |
|            | Homo-   | 1,136,245 | 0.09     | 156,910   | 0.01     |
| Z          | Hetero- | 4,794     | 0.005    | 73,289    | 0.08     |
|            | Homo-   | 106,347   | 0.12     | 13,179    | 0.015    |
| All        | Hetero- | 1,378,590 | 0.10     | 1,406,499 | 0.10     |
|            | Homo-   | 1,242,592 | 0.09     | 170,089   | 0.01     |

**Supplementary Table 18. Statistics of identified W-linked scaffolds.**

| <b>W-linked scaffolds</b>       | <b>Size (bp)</b> | <b>Number</b> |
|---------------------------------|------------------|---------------|
| <b>N90</b>                      | 10,387           | 123           |
| <b>N50</b>                      | 48,780           | 33            |
| <b>Longest</b>                  | 229,642          | -             |
| <b>Total Size</b>               | 32,904,513       | -             |
| <b>Total Number (&gt;=100b)</b> | -                | 2,315         |
| <b>Total Number (&gt;=2kb)</b>  | -                | 1,166         |
| <b>Annotated gene number</b>    | -                | 137           |
